# Supplementary material
Source: Springer Nature journal article supplement (https://springermedizin.de/resource/supplementary/12885_2009_1776_MOESM2_ESM.pdf/9472908)

**con**

**ATP**

**P2Y1**

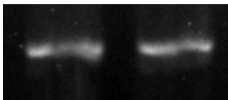

**P2Y2**

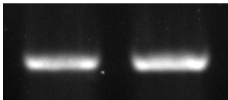

**P2Y4**

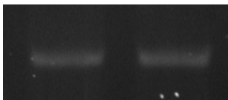

**P2Y6**

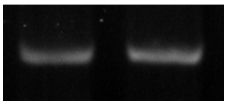

**GAPDH**

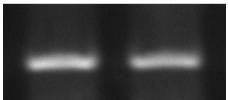

Supplement: MOESM2 [file 9472908]
